# Supplementary material
Source: PubMed Central journal article supplement (PMC8441593)
Supplement: jama-e2112836-s002.pdf [file jama-e2112836-s002.pdf]

## Supplemental Online Content

Luo H, Lu J, Bai Y, et al; the ESCORT-1st Investigators. Effect of camrelizumab vs placebo added to chemotherapy on survival and progression-free survival in patients with advanced or metastatic esophageal squamous cell carcinoma: the ESCORT-1st randomized clinical trial. *JAMA*. doi:10.1001/jama.2021.12836

**eFigure 1.** The plot of Schoenfeld residuals from stratified cox proportional regression model for overall survival

**eFigure 2.** Kaplan-Meier curve of progression-free survival assessed by investigator

**eFigure 3.** Kaplan-Meier curve of duration of response assessed by investigator

**eFigure 4.** Forest plot analyses of overall survival in subgroups

**eFigure 5.** Kaplan-Meier curves of overall survival in patients with baseline PD-L1 <1% or ≥1%.

**eFigure 6.** Forest plot analyses of progression-free survival assessed by independent review committee in subgroups

**eFigure 7.** Kaplan-Meier curves of progression-free survival per independent review committee in patients with baseline PD-L1 <1% or ≥1%.

**eFigure 8.** Kaplan-Meier curves of duration of response per investigator in patients with baseline PD-L1 <1% or ≥1%

**eTable 1.** List of investigators

**eTable 2.** Detailed reasons of patients who did not meet inclusion criteria or met exclusion criteria

**eTable 3.** Summary of post-discontinuation therapy

**eTable 4.** Tumor response assessed by investigator

**eTable 5.** Tumor responses per investigator in patients with baseline PD-L1 <1% or ≥1%

**eTable 6.** Treatment-related serious adverse events

**eTable 7.** Treatment discontinuation caused by treatment-related adverse events

**eTable 8.** Deaths caused by treatment-related adverse events

**eTable 9.** Immune-related adverse events

**eTable 10.** Baseline values and least squares mean score changes from baseline of the EORTC QLQ-C30

**eTable 11.** Baseline values and least squares mean score changes from baseline of the EORTC QLQ-OES18

This supplemental material has been provided by the authors to give readers additional information about their work.

**eFigure 1. The plot of Schoenfeld residuals from stratified cox proportional regression model for overall survival.**

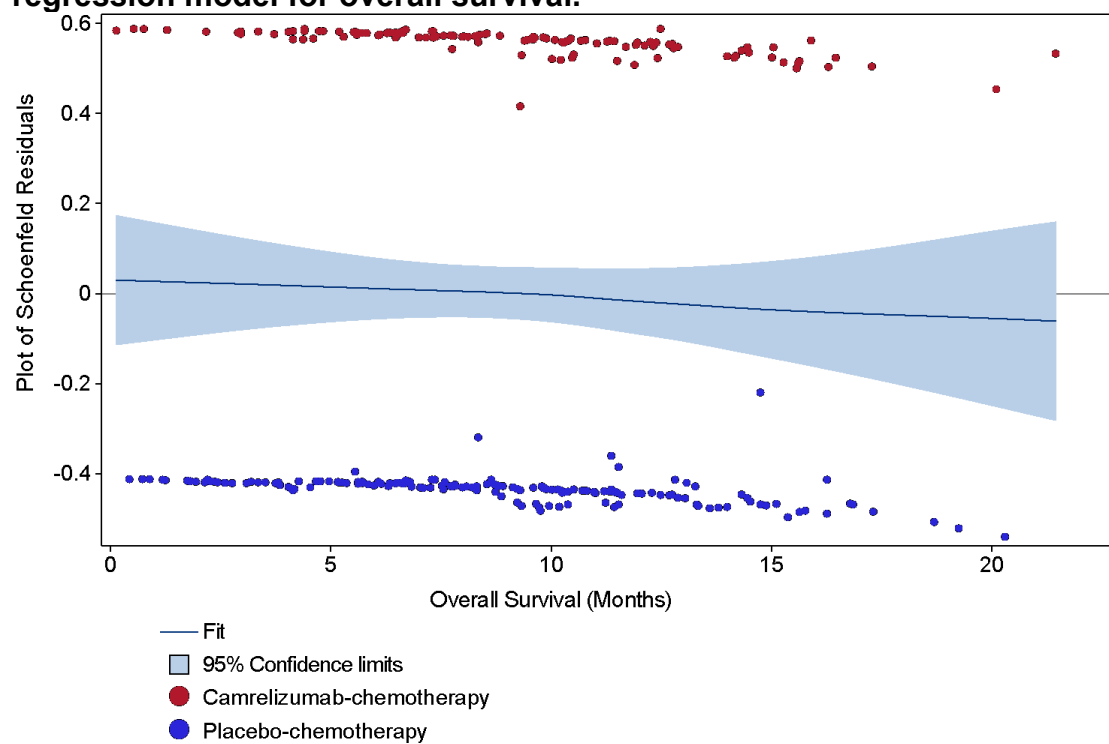

**eFigure 2. Kaplan-Meier curve of progression-free survival assessed by investigator.**

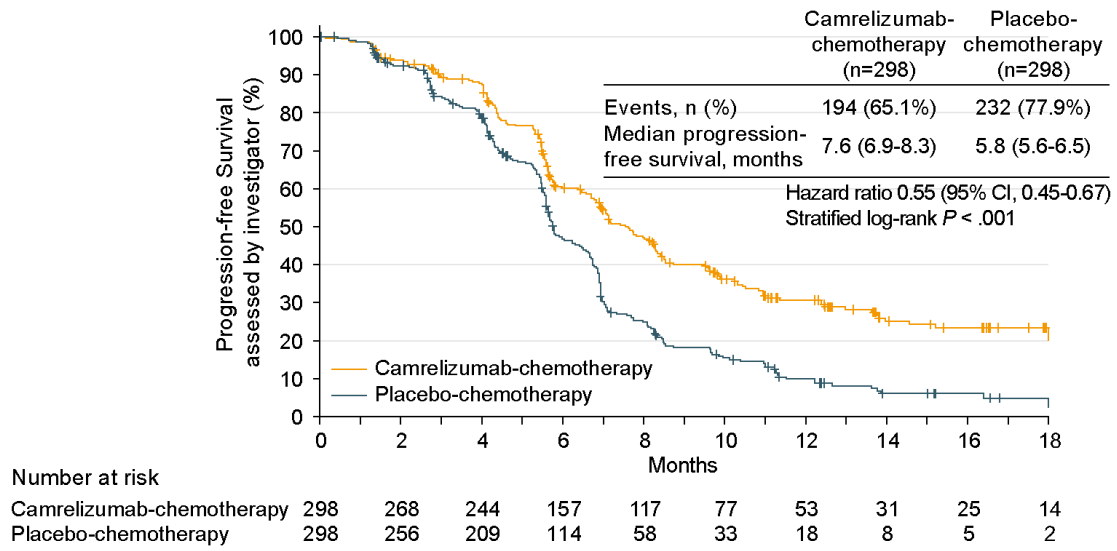

**eFigure 3. Kaplan-Meier curve of duration of response assessed by investigator.**

Abbreviation: CR, complete response; PR, partial response.

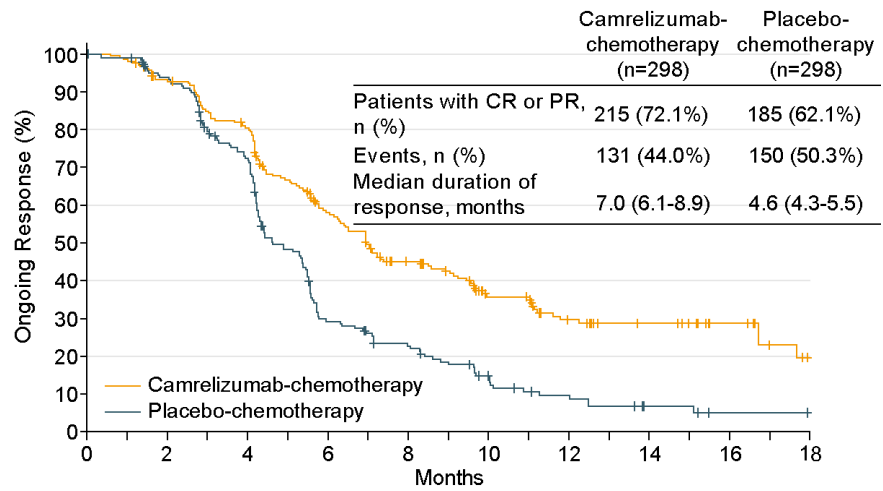

| Number at risk            | 0   | 2   | 4   | 6   | 8  | 10 | 12 | 14 | 16 | 18 |
|---------------------------|-----|-----|-----|-----|----|----|----|----|----|----|
| Camrelizumab-chemotherapy | 215 | 190 | 162 | 104 | 74 | 45 | 31 | 23 | 13 | 4  |
| Placebo-chemotherapy      | 185 | 164 | 122 | 47  | 33 | 18 | 10 | 4  | 1  | 0  |

## eFigure 4. Forest plot analyses of overall survival in subgroups.

The P value was post hoc analysis.

Abbreviation: ECOG, Eastern Cooperative Oncology Group.

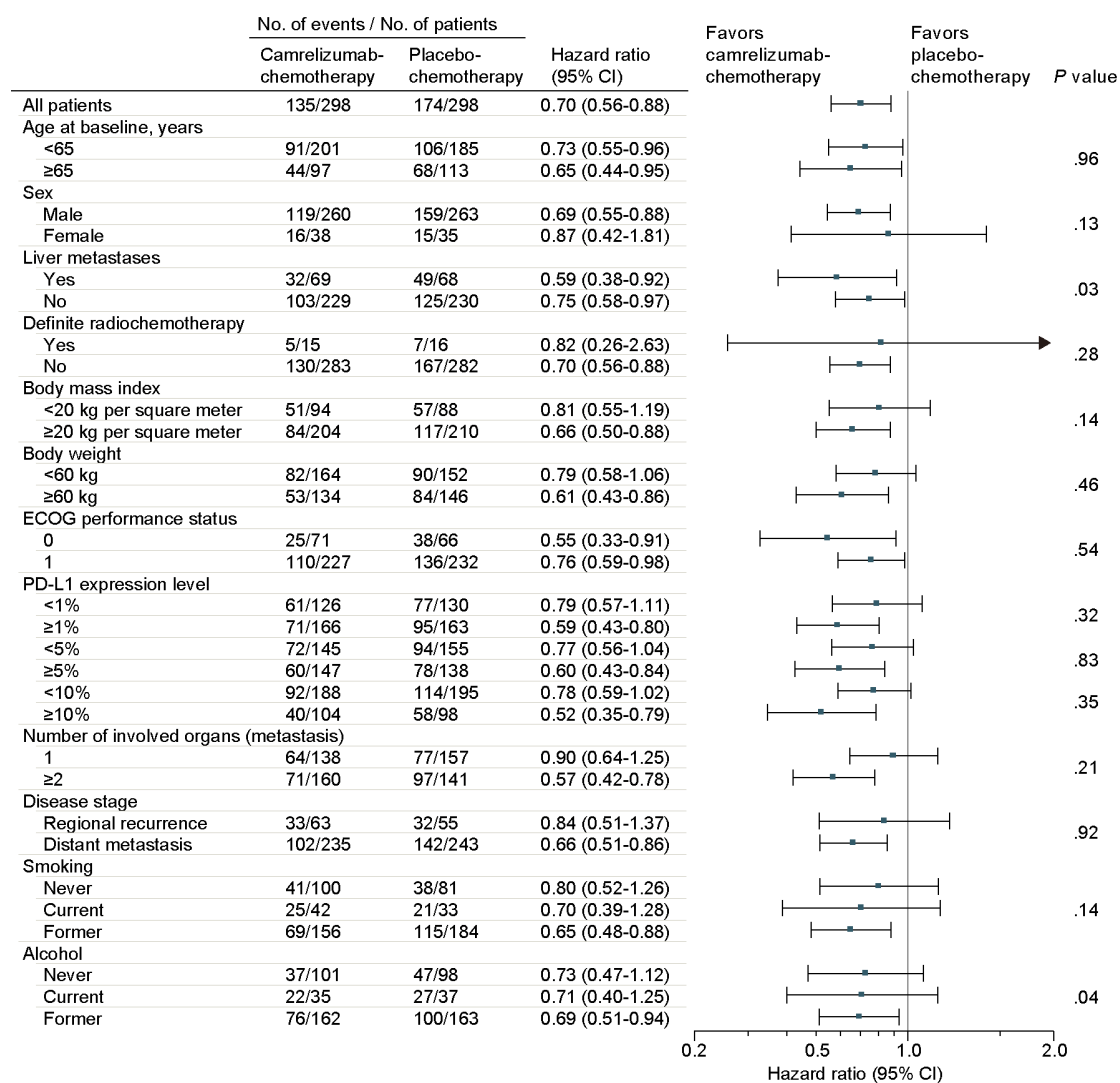

**eFigure 5. Kaplan-Meier curves of overall survival in patients with baseline PD-L1 <1% or ≥1%.**

Abbreviation: NR, not reached.

**A Overall survival in patients with PD-L1 TPS<1%**

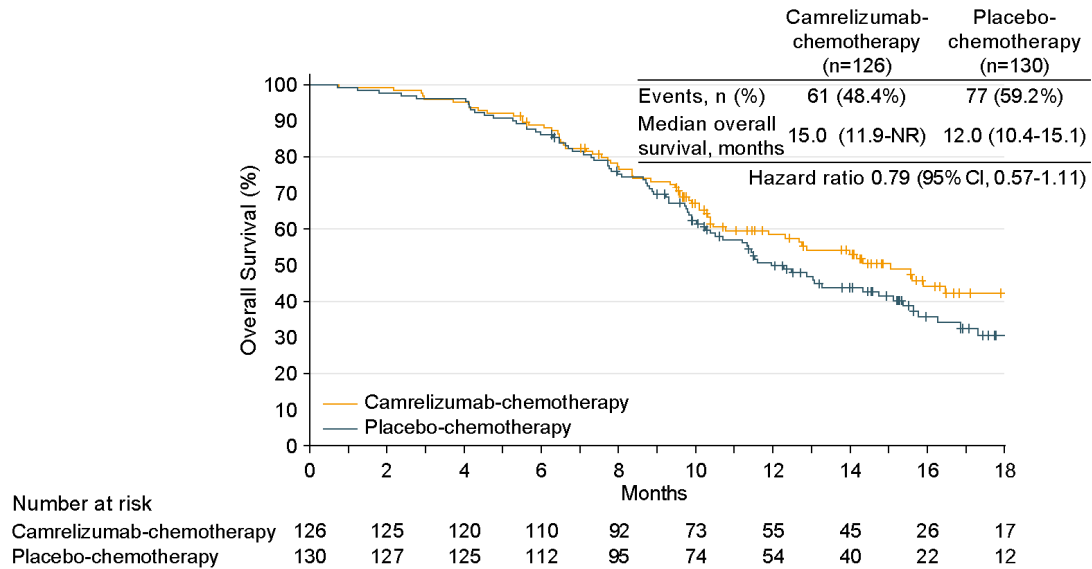

**B Overall survival in patients with PD-L1 TPS≥1%**

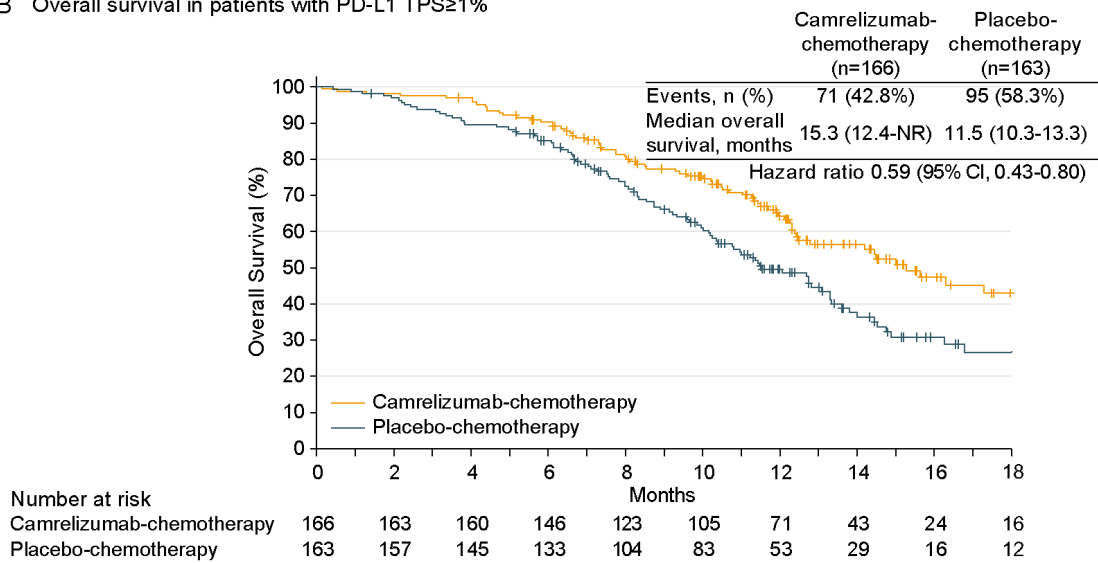

## eFigure 6. Forest plot analyses of progression-free survival assessed by independent review committee in subgroups.

The P value was post hoc analysis.

Abbreviation: ECOG, Eastern Cooperative Oncology Group.

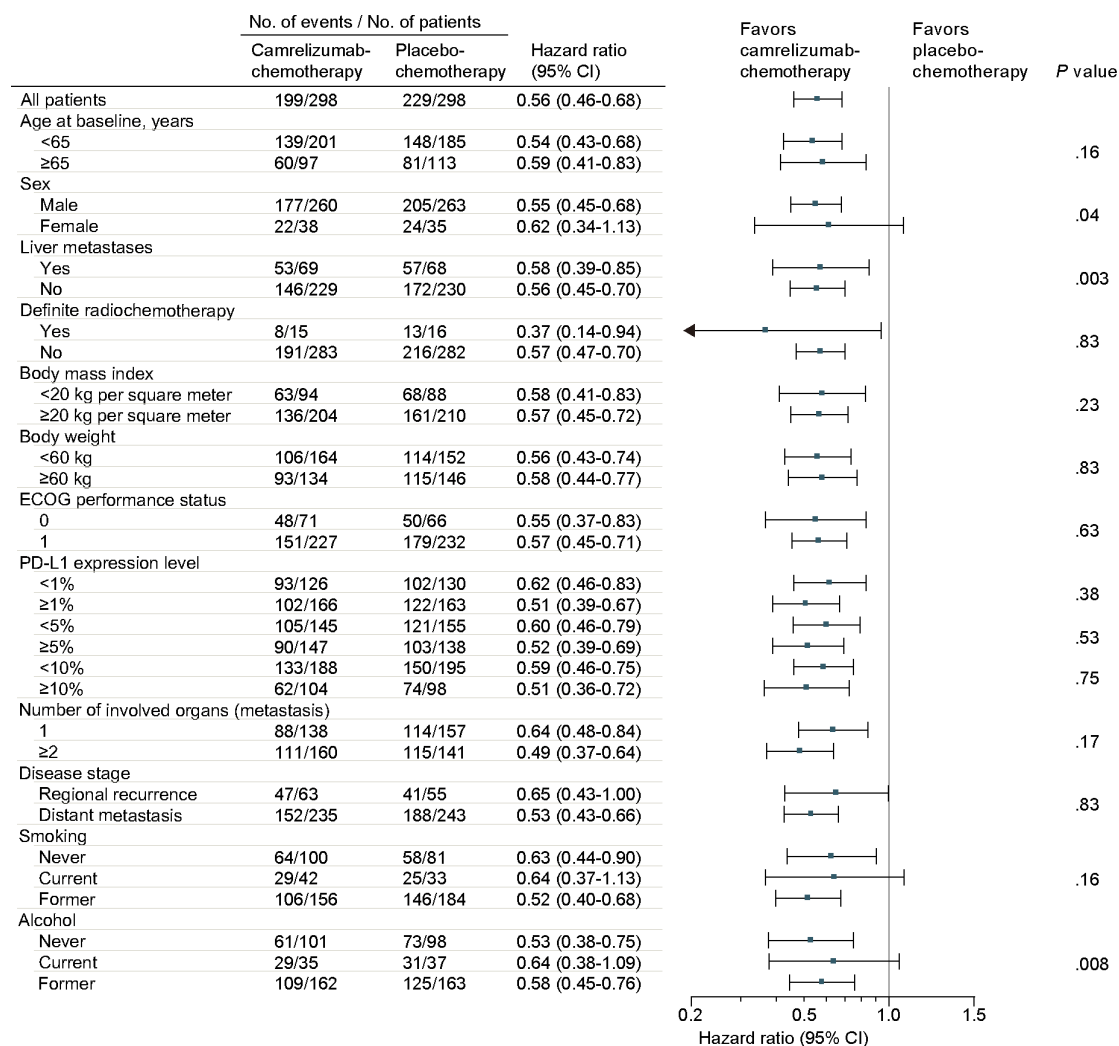

**eFigure 7. Kaplan-Meier curves of progression-free survival per independent review committee in patients with baseline PD-L1 <1% or ≥1%.**

**A** Progression-free survival per independent review committee in patients with PD-L1 TPS <1%

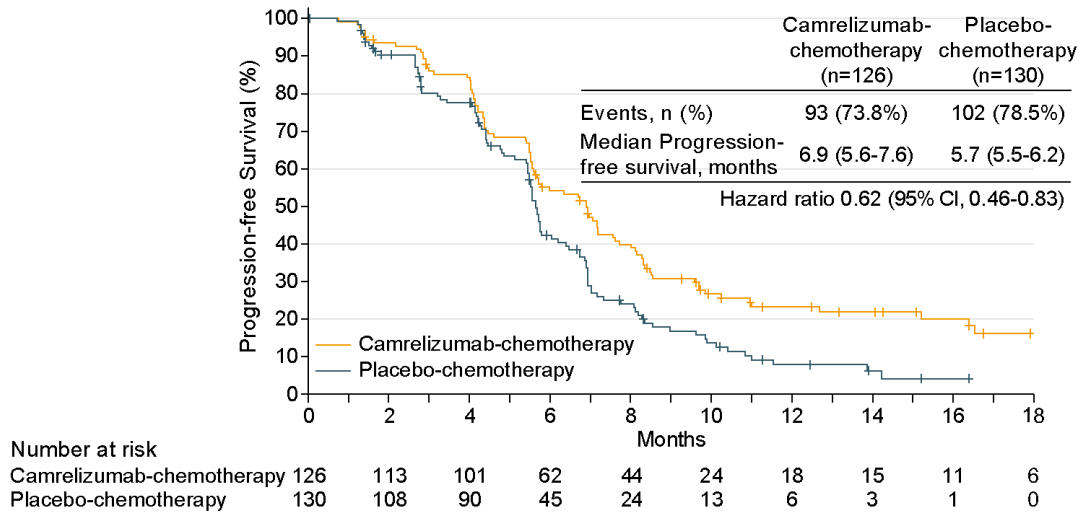

**B** Progression-free survival per independent review committee in patients with PD-L1 TPS ≥1%

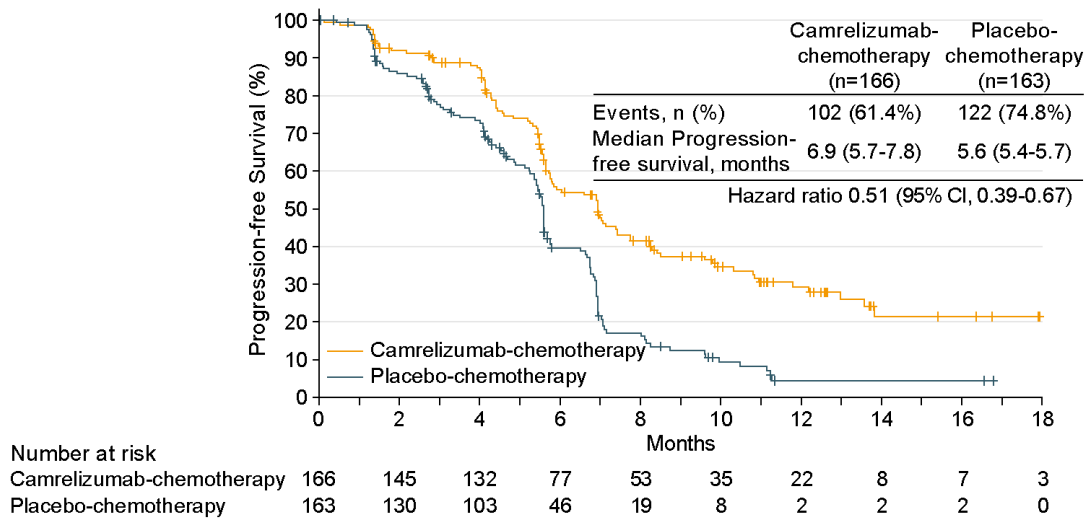



## eFigure 8. Kaplan-Meier curves of duration of response per investigator in patients with baseline PD-L1 <1% or ≥1%.

Abbreviation: CR, complete response; PR, partial response.

### A Duration of response per investigator in patients with PD-L1 TPS <1%

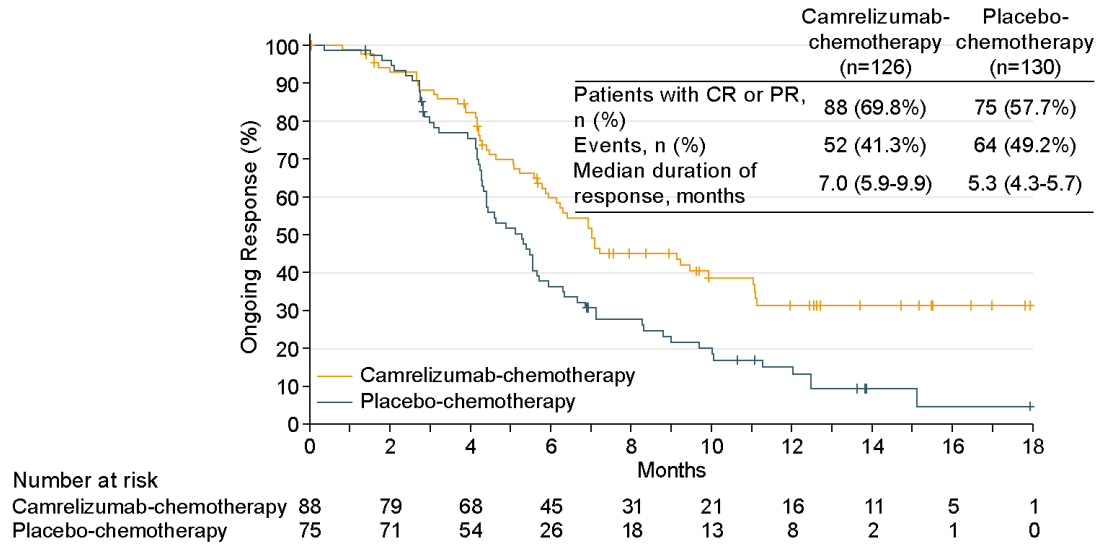

### B Duration of response per investigator in patients with PD-L1 TPS ≥1%

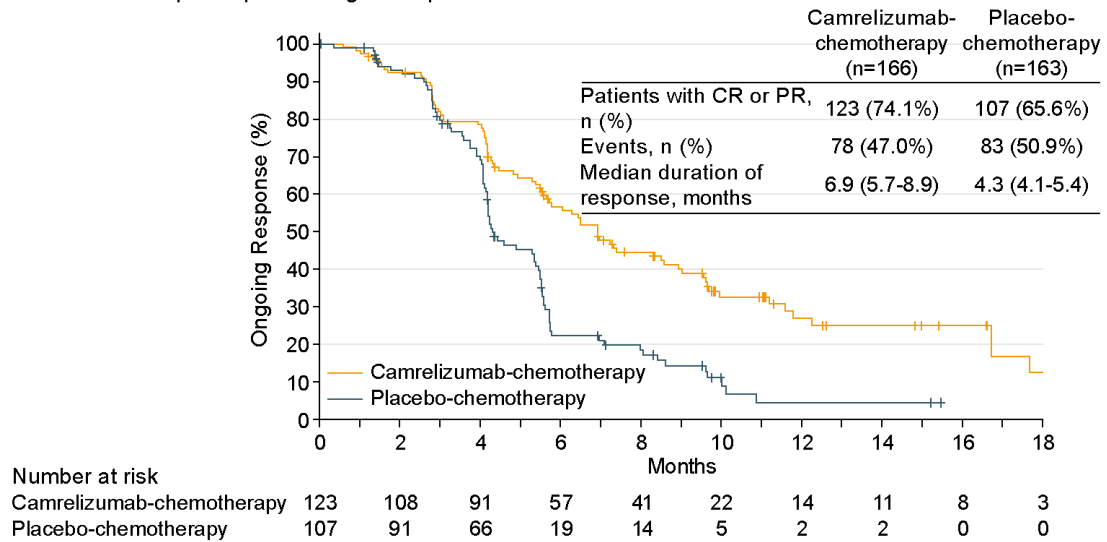

**eTable 1. List of investigators**

| <b>Principal investigators</b> | <b>Site name</b>                                                                          | <b>No. of patients</b> |
|--------------------------------|-------------------------------------------------------------------------------------------|------------------------|
| Rui-Hua Xu /<br>Huiyan Luo     | Sun Yat-sen University Cancer Center, Guangzhou, China                                    | 40                     |
| Jin Lu                         | Sichuan Cancer Hospital, Chengdu, China                                                   | 26                     |
| Yuxian Bai                     | Harbin Medical University Cancer Hospital, Harbin, China                                  | 23                     |
| Teng Mao                       | Shanghai Chest Hospital, Shanghai, China                                                  | 23                     |
| Jun Wang /<br>Junfeng Liu      | The Fourth Hospital of Hebei Medical University, Shijiazhuang, China                      | 22                     |
| Qingxia Fan                    | The First Affiliated Hospital of Zhengzhou University, Zhengzhou, China                   | 20                     |
| Yiping Zhang                   | Zhejiang Cancer Hospital, Hangzhou, China                                                 | 18                     |
| Kuaile Zhao                    | Fudan University Shanghai Cancer Center, Shanghai, China                                  | 18                     |
| Zhendong Chen                  | The Second Affiliated Hospital of Anhui Medical University, Hefei, China                  | 17                     |
| Jiancheng Li                   | Fujian Provincial Cancer Hospital, Fuzhou, China                                          | 16                     |
| Shegan Gao                     | The First Affiliated Hospital of Henan University of Science & Technology, Luoyang, China | 16                     |
| Zhichao Fu                     | 900 Hospital of the Joint Logistics Support Force, Fuzhou, China                          | 15                     |
| Kangsheng Gu                   | The First Affiliated Hospital of Anhui Medical University, Hefei, China                   | 14                     |
| Zhijia Liu                     | Jiangxi Provincial Cancer Hospital, Nanchang, China                                       | 12                     |
| Lin Wu                         | Hunan Cancer Hospital, Changsha, China                                                    | 12                     |
| Xiaodong Zhang                 | Peking University Cancer Hospital and Institute, Beijing, China                           | 11                     |
| Zuoxing Niu                    | Shandong Cancer Hospital Affiliated to Shandong University, Jinan, China                  | 11                     |
| Yi Ba                          | Tianjin Medical University Cancer Institute and Hospital, Tianjin, China                  | 11                     |

**eTable 1. List of investigators (Continued)**

| <b>Principal investigators</b> | <b>Site name</b>                                                                                  | <b>No. of patients</b> |
|--------------------------------|---------------------------------------------------------------------------------------------------|------------------------|
| Jifeng Feng                    | Jiangsu Cancer Hospital, Nanjing, China                                                           | 11                     |
| Helong Zhang                   | The Second Affiliated Hospital of Air Force Medical University, Xi'an, China                      | 11                     |
| Jing Huang                     | Cancer Hospital Chinese Academy of Medical Sciences, Beijing, China                               | 10                     |
| Ying Cheng                     | Jilin Cancer Hospital, Changchun, China                                                           | 10                     |
| Xianglin Yuan                  | Tongji Medical College Huazhong University of Science & Technology, Wuhan, China                  | 10                     |
| Ying Liu                       | Henan Cancer Hospital, Zhengzhou, China                                                           | 10                     |
| Dong Wang                      | Army Medical Center of PLA, Chongqing, China                                                      | 10                     |
| Li Zhang                       | Chongqing Three Gorges Central Hospital, Chongqing, China                                         | 10                     |
| Xuhong Min                     | Anhui Chest Hospital, Hefei, China                                                                | 10                     |
| Dong Ma                        | Guangdong Provincial People's Hospital, Guangzhou, China                                          | 9                      |
| Li Liu                         | Union Hospital Tongji Medical College Huazhong University of Science and Technology, Wuhan, China | 9                      |
| Feng Ye                        | The First Affiliated Hospital of Xiamen University, Xiamen, China                                 | 8                      |
| Tianshu Liu                    | Zhongshan Hospital of Fudan University, Shanghai, China                                           | 8                      |
| Xiuwen Wang                    | Qilu Hospital of Shandong University, Jinan, China                                                | 8                      |
| Likun Liu                      | Shanxi Provincial Hospital of Traditional Chinese Medicine, Taiyuan, China                        | 8                      |
| Bing Xia                       | Hangzhou First People's Hospital, Hangzhou, China                                                 | 7                      |
| Fengming Ran                   | Hubei Cancer Hospital, Wuhan, China                                                               | 7                      |
| Sanyuan Sun                    | Xuzhou Central Hospital, Nanjing, China                                                           | 7                      |
| Zhanhui Miao                   | The First Affiliated Hospital of Xinxiang Medical College, Xinxiang, China                        | 7                      |

**eTable 1. List of investigators (Continued)**

| <b>Principal investigators</b> | <b>Site name</b>                                                                        | <b>No. of patients</b> |
|--------------------------------|-----------------------------------------------------------------------------------------|------------------------|
| Jun Bie                        | Nanchong Central Hospital, Nanchong, China                                              | 7                      |
| Yong Gao                       | Shanghai Dongfang Hospital, Shanghai, China                                             | 7                      |
| Junyan Yu                      | Heping Hospital Affiliated to Changzhi Medical College, Changzhi, China                 | 7                      |
| Li Chen                        | The First Affiliated Hospital of Nanchang University, Nanchang, China                   | 6                      |
| Yifu He                        | Anhui Provincial Cancer Hospital, Hefei, China                                          | 6                      |
| Wei Ren                        | Drum Tower Hospital Affiliated to Nanjing University of Medicine, Nanjing, China        | 6                      |
| Suxia Luo                      | Henan Cancer Hospital, Zhengzhou, China                                                 | 6                      |
| Guangqiang Zhao                | Yunnan Cancer Hospital, Kunming, China                                                  | 6                      |
| Youen Lin                      | Jieyang People's Hospital, Jieyang, China                                               | 6                      |
| Long Chen                      | Guangxi Medical University Affiliated Tumor Hospital, Nanning, China                    | 6                      |
| Zhiyuan Guo                    | Handan Central Hospital, Handan, China                                                  | 6                      |
| Chunhong Hu                    | The Second Xiangya Hospital of Central South University, Changsha, China                | 5                      |
| Ying Wang                      | Chongqing University Cancer Hospital, Chongqing, China                                  | 5                      |
| Nong Xu                        | The First Affiliated Hospital of Medical School of Zhejiang University, Hangzhou, China | 4                      |
| Baofu Chen                     | Taizhou Hospital of Zhejiang Province, Taizhou, China                                   | 4                      |
| Xianbao Zhan                   | Shanghai Changhai Hospital, Shanghai, China                                             | 3                      |
| Yuping Chen                    | Cancer Hospital of Shantou University Medical College, Guangzhou, China                 | 2                      |
| Hongda Lu                      | The Central Hospital of Wuhan, Wuhan, China                                             | 2                      |
| Shukui Qin                     | Qinhuai Hospital of General Hospital of Eastern Theater Command, Nanjing, China         | 2                      |
| Guolei Wang                    | Henan Provincial Chest Hospital, Zhengzhou, China                                       | 2                      |

**eTable 1. List of investigators (Continued)**

| <b>Principal investigators</b> | <b>Site name</b>                                                                    | <b>No. of patients</b> |
|--------------------------------|-------------------------------------------------------------------------------------|------------------------|
| Liming Chen                    | The First Affiliated Hospital of Shantou University Medical College, Shantou, China | 1                      |
| Li Bai                         | PLA General Hospital, Beijing, China                                                | 1                      |
| Jingdong Zhang                 | Liaoning Province Cancer Hospital, Shenyang, China                                  | 1                      |

**eTable 2. Detailed reasons of patients who did not meet inclusion criteria or met exclusion criteria**

| No. of criteria in protocol     | Detailed criteria                                                                                                                                                                                                                                                                                                                             | No. of patients |
|---------------------------------|-----------------------------------------------------------------------------------------------------------------------------------------------------------------------------------------------------------------------------------------------------------------------------------------------------------------------------------------------|-----------------|
| Total                           |                                                                                                                                                                                                                                                                                                                                               | 132             |
| Did not meet inclusion criteria |                                                                                                                                                                                                                                                                                                                                               | 52              |
| #1                              | Aged 18–75 years, male or female.                                                                                                                                                                                                                                                                                                             | 1               |
| #2                              | Histologically or cytologically diagnosed with unresectable locally advanced/recurrent (unable to receive esophagectomy and definitive chemoradiation) or distant metastatic esophageal squamous cell carcinoma                                                                                                                               | 8               |
| #3                              | Have not received any systemic anti-tumor treatment. A patient who has received neoadjuvant/adjuvant and definitive chemoradiation can be screened if his/her last treatment is more than 6 months from recurrence or progression                                                                                                             | 5               |
| #4                              | With at least one measurable lesion (cavity structures such as esophagus may not serve as measurable lesions) according to RECIST v1.1 criteria, which has not received any local treatment including radiotherapy (a lesion located in an area subjected to a previous radiotherapy can be selected as the target lesion if PD is confirmed) | 14              |
| #5                              | Tissue samples for biomarker (such as PD-L1) analysis must be provided. Fresh tissues are preferred. Archival samples of 5–8 paraffin embedded sections that are 3–5 µm thick are also acceptable if a fresh biopsy is not accessible                                                                                                         | 1               |
| #6                              | ECOG: 0–1                                                                                                                                                                                                                                                                                                                                     | 2               |
| #7                              | Expected survival ≥ 12 weeks                                                                                                                                                                                                                                                                                                                  | 2               |
| #8                              | Normal laboratory test results                                                                                                                                                                                                                                                                                                                | 19              |

**eTable 2. Detailed reasons of patients who did not meet inclusion criteria or met exclusion criteria (Continued)**

| No. of criteria in protocol | Detailed criteria                                                                                                                                                                                                                                                                                                                                                                                                                                                                                                                                                                                            | No. of patients |
|-----------------------------|--------------------------------------------------------------------------------------------------------------------------------------------------------------------------------------------------------------------------------------------------------------------------------------------------------------------------------------------------------------------------------------------------------------------------------------------------------------------------------------------------------------------------------------------------------------------------------------------------------------|-----------------|
| #10                         | Subjects must participate voluntarily, sign the informed consent form, have good compliance, and cooperate with follow-up visits.                                                                                                                                                                                                                                                                                                                                                                                                                                                                            | 2               |
| Met exclusion criteria      |                                                                                                                                                                                                                                                                                                                                                                                                                                                                                                                                                                                                              | 82              |
| #1                          | BMI < 18.5 kg/m <sup>2</sup> or weight loss ≥ 10% within 2 months before screening (at the same time, the effect of a large amount of pleural effusions and ascites on body weight should be considered)                                                                                                                                                                                                                                                                                                                                                                                                     | 9               |
| #3                          | Significant tumor invasion into adjacent organs (aorta or trachea) of esophageal lesions leading to higher risk of bleeding or fistula                                                                                                                                                                                                                                                                                                                                                                                                                                                                       | 12              |
| #4                          | Presence of uncontrollable pleural effusion, pericardial effusion, or ascites requiring repeated drainage                                                                                                                                                                                                                                                                                                                                                                                                                                                                                                    | 2               |
| #7                          | Suffering toxicity from prior anti-tumor therapy that has not recovered to CTCAE Grade ≤ 1 (except alopecia) or a level specified in inclusion/exclusion criteria                                                                                                                                                                                                                                                                                                                                                                                                                                            | 1               |
| #8                          | With central nervous system metastases                                                                                                                                                                                                                                                                                                                                                                                                                                                                                                                                                                       | 3               |
| #9                          | With any active autoimmune disease, or a history of autoimmune disease (including but not limited to interstitial pneumonia, colitis, hepatitis, hypophysitis, vasculitis, nephritis, hyperthyroidism, and hypothyroidism), except for: vitiligo, or cured childhood asthma/allergy that do not require any intervention in adulthood; autoimmune-mediated hypothyroidism treated with a stable dose of thyroid hormone replacement therapy; and type I diabetes mellitus treated with a stable dose of insulin; patients with asthma requiring medical intervention with bronchodilators cannot be enrolled | 11              |

**eTable 2. Detailed reasons of patients who did not meet inclusion criteria or met exclusion criteria (Continued)**

| No. of criteria in protocol | Detailed criteria                                                                                                                                                                                                                                                                                                                                                                                                                                                                                             | No. of patients |
|-----------------------------|---------------------------------------------------------------------------------------------------------------------------------------------------------------------------------------------------------------------------------------------------------------------------------------------------------------------------------------------------------------------------------------------------------------------------------------------------------------------------------------------------------------|-----------------|
| #11                         | Having any poorly-controlled cardiovascular clinical symptom or disease, including but not limited to: (1) NYHA Class II or higher cardiac failure, (2) unstable angina, (3) myocardial infarction within the past year, and (4) clinically significant supraventricular or ventricular arrhythmia without clinical intervention or is poorly controlled after clinical intervention                                                                                                                          | 3               |
| #12                         | Having any serious infection (CTCAE Grade > 2) within 4 weeks prior to the first dose of the study drug, such as serious pneumonia, bacteremia, or infection-related complication requiring hospitalization; baseline chest radiography suggesting presence of active lung inflammation, infection symptoms and signs present within 2 weeks prior to the first dose of the study drug or requiring treatment by oral or intravenous administration of any antibiotic, except prophylactic use of antibiotics | 13              |
| #13                         | With a history of interstitial lung disease (except radiation pneumonitis that has not received hormone treatment), or a history of non-infectious pneumonitis                                                                                                                                                                                                                                                                                                                                                | 4               |
| #14                         | Having active tuberculosis infection found in medical history or through CT examination, or having a history of active tuberculosis infection within 1 year prior to enrollment, or having had a history of active tuberculosis infection more than 1 year prior to enrollment but being treatment-naive                                                                                                                                                                                                      | 2               |
| #15                         | With active hepatitis B virus (HBV DNA $\geq$ 2000 IU/mL or $10^4$ copies/mL), hepatitis C virus (positive for hepatitis C antibody, and HCV-RNA higher than the lower limit of detection of the analytical method)                                                                                                                                                                                                                                                                                           | 9               |



**eTable 2. Detailed reasons of patients who did not meet inclusion criteria or met exclusion criteria (Continued)**

| No. of criteria in protocol | Detailed criteria                                                                                                                                                                                                                                                                                                                                                           | No. of patients |
|-----------------------------|-----------------------------------------------------------------------------------------------------------------------------------------------------------------------------------------------------------------------------------------------------------------------------------------------------------------------------------------------------------------------------|-----------------|
| #16                         | Diagnosed with any other malignancy within 5 years prior to the first dose of the study drug, with the exception of malignancies with low risk of metastasis and death (5-year survival rate > 90%) such as adequately treated basal cell or squamous cell skin cancer or cervical carcinoma in situ                                                                        | 4               |
| #18                         | Other factors, as determined by the investigator, which may result in premature discontinuation of treatment. For example, other serious medical conditions (including mental illnesses) requiring concomitant treatment, serious laboratory abnormalities, family or social factors, and other conditions that may affect subjects' safety or the collection of trial data | 11              |

**eTable 3. Summary of post-discontinuation therapy.**

|                                             | <b>Camrelizumab-<br/>chemotherapy<br/>(N = 298)</b> | <b>Placebo-<br/>chemotherapy<br/>(N = 298)</b> |
|---------------------------------------------|-----------------------------------------------------|------------------------------------------------|
| Receiving at least one anti-tumor therapies | 119 (39.9)                                          | 158 (53.0)                                     |
| Surgery                                     |                                                     |                                                |
| Esophagectomy                               | 0                                                   | 1 (0.3)                                        |
| Other surgeries                             | 2 (0.7)                                             | 3 (1.0)                                        |
| Radiotherapy                                | 51 (17.1)                                           | 58 (19.5)                                      |
| Systemic anti-tumor therapies               |                                                     |                                                |
| Chemotherapy                                | 77 (25.8)                                           | 112 (37.6)                                     |
| Fluorouracil + platinum                     | 16 (5.4)                                            | 22 (7.4)                                       |
| Fluorouracil                                | 16 (5.4)                                            | 21 (7.0)                                       |
| Paclitaxel + platinum                       | 10 (3.4)                                            | 17 (5.7)                                       |
| Fluorouracil + Irinotecan                   | 9 (3.0)                                             | 15 (5.0)                                       |
| Paclitaxel                                  | 3 (1.0)                                             | 9 (3.0)                                        |
| Others                                      | 23 (7.7)                                            | 28 (9.4)                                       |
| Targeted therapy                            | 28 (9.4)                                            | 56 (18.8)                                      |
| Immunotherapy                               | 8 (2.7)                                             | 40 (13.4)                                      |
| Others                                      | 2 (0.7)                                             | 1 (0.3)                                        |

Data are n (%).

**eTable 4. Tumor response assessed by investigator.**

|                                    | <b>Camrelizumab-<br/>chemotherapy (N =<br/>298)</b> | <b>Placebo-<br/>chemotherapy (N =<br/>298)</b> |
|------------------------------------|-----------------------------------------------------|------------------------------------------------|
| Best overall response <sup>a</sup> |                                                     |                                                |
| Complete response                  | 20 (6.7)                                            | 11 (3.7)                                       |
| Partial response                   | 195 (65.4)                                          | 174 (58.4)                                     |
| Stable disease                     | 57 (19.1)                                           | 80 (26.8)                                      |
| Progressive disease                | 14 (4.7)                                            | 15 (5.0)                                       |
| Not evaluable <sup>b</sup>         | 0                                                   | 2 (0.7)                                        |
| Not assessable <sup>c</sup>        | 12 (4.0)                                            | 16 (5.4)                                       |
| Objective response <sup>d</sup>    | 215 (72.1, 66.7-77.2)                               | 185 (62.1, 56.3-67.6)                          |
| Difference (95% CI)                | 10.1 (2.6-17.6)                                     |                                                |
| Two-sided P value <sup>e</sup>     | 0.009                                               |                                                |
| Disease control <sup>f</sup>       | 272 (91.3, 87.5-94.2)                               | 265 (88.9, 84.8-92.3)                          |
| Difference (95% CI)                | 2.3 (-2.4-7.1)                                      |                                                |
| Two-sided P value                  | 0.33                                                |                                                |

Data are n (%) or n (%; 95% CI).

<sup>a</sup> Responses were evaluated according to RECIST version 1.1 by investigator.

<sup>b</sup> "Not evaluable" included patients who had at least one post-baseline tumor assessments, but their target lesions at post-baseline were not evaluable for response determination.

<sup>c</sup> "Not assessable" included patients whose post-baseline tumor assessments were not performed.

<sup>d</sup> Objective response was defined as patients whose best overall response was complete or partial response.

<sup>e</sup> Objective response rate and disease control rate were presented with 95% CIs (Clopper-Pearson method). The two-sided 95% CIs of difference between the groups are calculated using Wald method and the two-sided P value are estimated using the stratified Cochran-Mantel-Haenszel test.

<sup>f</sup> Disease control was defined as patients whose best overall response was complete response, partial response, or stable disease.

**eTable 5. Tumor responses per investigator in patients with baseline PD-L1 <1% or ≥1%.**

|                       | <b>Camrelizumab-<br/>chemotherapy</b> | <b>Placebo-<br/>chemotherapy</b> |
|-----------------------|---------------------------------------|----------------------------------|
| PD-L1 <1%             |                                       |                                  |
| Number of patients    | 126                                   | 130                              |
| Overall response rate | 69.8 (61.0-77.7)                      | 57.7 (48.7-66.3)                 |
| Disease control rate  | 91.3 (84.9-95.6)                      | 89.2 (82.6-94.0)                 |
| PD-L1 ≥1%             |                                       |                                  |
| Number of patients    | 166                                   | 163                              |
| Overall response rate | 74.1 (66.7-80.6)                      | 65.6 (57.8-72.9)                 |
| Disease control rate  | 92.2 (87.0-95.8)                      | 88.3 (82.4-92.8)                 |

Data are n or % (95% CI).

**eTable 6. Treatment-related serious adverse events.**

|                                                        | <b>Camrelizumab-<br/>chemotherapy<br/>(N = 298)</b> | <b>Placebo-<br/>chemotherapy<br/>(N = 297)</b> |
|--------------------------------------------------------|-----------------------------------------------------|------------------------------------------------|
| Total                                                  | 90 (30.2)                                           | 69 (23.2)                                      |
| Events occurring in ≥1% of patients in either group    |                                                     |                                                |
| Pneumonitis                                            | 17 (5.7)                                            | 8 (2.7)                                        |
| Anemia                                                 | 10 (3.4)                                            | 1 (0.3)                                        |
| White blood cell count decreased                       | 8 (2.7)                                             | 10 (3.4)                                       |
| Neutrophil count decreased                             | 8 (2.7)                                             | 10 (3.4)                                       |
| Vomiting                                               | 8 (2.7)                                             | 4 (1.3)                                        |
| Pneumonia                                              | 6 (2.0)                                             | 5 (1.7)                                        |
| Febrile neutropenia                                    | 5 (1.7)                                             | 8 (2.7)                                        |
| Nausea                                                 | 4 (1.3)                                             | 3 (1.0)                                        |
| Hyponatremia                                           | 4 (1.3)                                             | 2 (0.7)                                        |
| Blood creatinine increased                             | 4 (1.3)                                             | 1 (0.3)                                        |
| Platelet count decreased                               | 4 (1.3)                                             | 0                                              |
| Reactive cutaneous capillary endothelial proliferation | 4 (1.3)                                             | 0                                              |
| Alanine aminotransferase increased                     | 3 (1.0)                                             | 2 (0.7)                                        |
| Aspartate aminotransferase increased                   | 3 (1.0)                                             | 2 (0.7)                                        |
| Hypokalemia                                            | 3 (1.0)                                             | 1 (0.3)                                        |
| Death from unknown cause                               | 2 (0.7)                                             | 5 (1.7)                                        |
| Anal abscess                                           | 0                                                   | 3 (1.0)                                        |

Data are n (%). Treatment-related serious adverse event indicates the treatment-related adverse event that leads to death, life-threatening, hospitalization (initial or prolonged), disability or permanent damage, congenital anomaly/birth defect, required intervention to prevent permanent impairment or damage (devices), or other important medical events.

**eTable 7. Treatment discontinuation caused by treatment-related adverse events.**

|                                      | <b>Camrelizumab-<br/>chemotherapy<br/>(N = 298)</b> | <b>Placebo-<br/>chemotherapy<br/>(N = 297)</b> |
|--------------------------------------|-----------------------------------------------------|------------------------------------------------|
| Total                                | 36 (12.1)                                           | 28 (9.4)                                       |
| Anemia                               | 6 (2.0)                                             | 1 (0.3)                                        |
| Creatinine renal clearance decreased | 4 (1.3)                                             | 1 (0.3)                                        |
| Pneumonitis                          | 4 (1.3)                                             | 4 (1.3)                                        |
| Blood creatinine increased           | 3 (1.0)                                             | 4 (1.3)                                        |
| Neurotoxicity                        | 2 (0.7)                                             | 1 (0.3)                                        |
| Hypersensitivity                     | 2 (0.7)                                             | 1 (0.3)                                        |
| Drug hypersensitivity                | 2 (0.7)                                             | 0                                              |
| Decreased appetite                   | 2 (0.7)                                             | 0                                              |
| Asthenia                             | 2 (0.7)                                             | 3 (1.0)                                        |
| Platelet count decreased             | 1 (0.3)                                             | 0                                              |
| Febrile neutropenia                  | 1 (0.3)                                             | 0                                              |
| Hypoesthesia                         | 1 (0.3)                                             | 2 (0.7)                                        |
| Peripheral sensory neuropathy        | 1 (0.3)                                             | 1 (0.3)                                        |
| Neuropathy peripheral                | 1 (0.3)                                             | 1 (0.3)                                        |
| Diabetic ketoacidosis                | 1 (0.3)                                             | 0                                              |
| Diarrhea                             | 1 (0.3)                                             | 0                                              |
| Hematemesis                          | 1 (0.3)                                             | 0                                              |
| Esophageal fistula                   | 1 (0.3)                                             | 0                                              |
| Hand-foot syndrome                   | 1 (0.3)                                             | 0                                              |
| Pruritus                             | 1 (0.3)                                             | 0                                              |
| Atrial flutter                       | 1 (0.3)                                             | 0                                              |
| Septic shock                         | 1 (0.3)                                             | 0                                              |
| Infusion related reaction            | 1 (0.3)                                             | 0                                              |
| Hypophysitis                         | 1 (0.3)                                             | 0                                              |
| Pruritus genital                     | 1 (0.3)                                             | 0                                              |
| Hypovolemic shock                    | 1 (0.3)                                             | 0                                              |

**eTable 7. Treatment discontinuation caused by treatment-related adverse events. (Continued)**

|                                    | <b>Camrelizumab-<br/>chemotherapy<br/>(N = 298)</b> | <b>Placebo-<br/>chemotherapy<br/>(N = 297)</b> |
|------------------------------------|-----------------------------------------------------|------------------------------------------------|
| Neutrophil count decreased         | 0                                                   | 3 (1.0)                                        |
| White blood cell count decreased   | 0                                                   | 2 (0.7)                                        |
| Alanine aminotransferase increased | 0                                                   | 1 (0.3)                                        |
| Blood urea increased               | 0                                                   | 1 (0.3)                                        |
| Immune-mediated pneumonitis        | 0                                                   | 1 (0.3)                                        |
| Upper airway obstruction           | 0                                                   | 1 (0.3)                                        |
| Esophagobronchial fistula          | 0                                                   | 1 (0.3)                                        |
| Malnutrition                       | 0                                                   | 2 (0.7)                                        |
| Hypoproteinemia                    | 0                                                   | 1 (0.3)                                        |
| Hypocalcemia                       | 0                                                   | 1 (0.3)                                        |
| Hypokalemia                        | 0                                                   | 1 (0.3)                                        |
| Hyponatremia                       | 0                                                   | 1 (0.3)                                        |
| Electrolyte imbalance              | 0                                                   | 1 (0.3)                                        |
| Ileus                              | 0                                                   | 1 (0.3)                                        |
| Flatulence                         | 0                                                   | 1 (0.3)                                        |
| Inguinal hernia                    | 0                                                   | 1 (0.3)                                        |
| Vomiting                           | 0                                                   | 1 (0.3)                                        |
| Acute myocardial infarction        | 0                                                   | 1 (0.3)                                        |
| Myocarditis                        | 0                                                   | 1 (0.3)                                        |
| Acute kidney injury                | 0                                                   | 1 (0.3)                                        |

Data are n (%).

**eTable 8. Deaths caused by treatment-related adverse events.**

|                             | <b>Camrelizumab-<br/>chemotherapy<br/>(N = 298)</b> | <b>Placebo-<br/>chemotherapy<br/>(N = 297)</b> |
|-----------------------------|-----------------------------------------------------|------------------------------------------------|
| Total                       | 9 (3.0)                                             | 11 (3.7)                                       |
| Death from unknown cause    | 2 (0.7)                                             | 5 (1.7)                                        |
| Respiratory failure         | 1 (0.3)                                             | 1 (0.3)                                        |
| Condition aggravated        | 1 (0.3)                                             | 0                                              |
| Sudden cardiac death        | 1 (0.3)                                             | 0                                              |
| Interstitial lung disease   | 1 (0.3)                                             | 0                                              |
| Completed suicide           | 1 (0.3)                                             | 0                                              |
| Hematemesis                 | 1 (0.3)                                             | 0                                              |
| Circulatory collapse        | 1 (0.3)                                             | 0                                              |
| Anemia                      | 1 (0.3)                                             | 0                                              |
| Pneumonia                   | 0                                                   | 1 (0.3)                                        |
| Infected shock              | 0                                                   | 1 (0.3)                                        |
| Electrolyte imbalance       | 0                                                   | 1 (0.3)                                        |
| Pneumonitis                 | 0                                                   | 1 (0.3)                                        |
| Immune-mediated pneumonitis | 0                                                   | 1 (0.3)                                        |

Data are n (%).



**eTable 9. Immune-related adverse events.**

|                                                     | <b>Camrelizumab-<br/>chemotherapy<br/>(N = 298)</b> | <b>Placebo-<br/>chemotherapy<br/>(N = 297)</b> |
|-----------------------------------------------------|-----------------------------------------------------|------------------------------------------------|
| Total                                               | 252 (84.6)                                          | 98 (33.0)                                      |
| Events occurring in ≥1% of patients in either group |                                                     |                                                |
| Reactive capillary endothelial proliferation        | 238 (79.9)                                          | 32 (10.8)                                      |
| Hypothyroidism                                      | 34 (11.4)                                           | 13 (4.4)                                       |
| Pruritus                                            | 20 (6.7)                                            | 7 (2.4)                                        |
| Hyperthyroidism                                     | 16 (5.4)                                            | 3 (1.0)                                        |
| Rash                                                | 16 (5.4)                                            | 6 (2.0)                                        |
| Pneumonitis                                         | 15 (5.0)                                            | 9 (3.0)                                        |
| Blood thyroid stimulating hormone decreased         | 10 (3.4)                                            | 1 (0.3)                                        |
| Diarrhea                                            | 8 (2.7)                                             | 7 (2.4)                                        |
| Proteinuria                                         | 8 (2.7)                                             | 3 (1.0)                                        |
| Tri-iodothyronine free decreased                    | 7 (2.3)                                             | 7 (2.4)                                        |
| Blood thyroid stimulating hormone increased         | 7 (2.3)                                             | 5 (1.7)                                        |
| Aspartate aminotransferase increased                | 5 (1.7)                                             | 6 (2.0)                                        |
| Dermatitis allergic                                 | 5 (1.7)                                             | 0                                              |
| Immune-mediated pneumonitis                         | 5 (1.7)                                             | 2 (0.7)                                        |
| Alanine aminotransferase increased                  | 4 (1.3)                                             | 7 (2.4)                                        |
| Blood creatinine increased                          | 4 (1.3)                                             | 6 (2.0)                                        |
| Blood urea increased                                | 4 (1.3)                                             | 3 (1.0)                                        |
| Cough                                               | 4 (1.3)                                             | 1 (0.3)                                        |
| Pyrexia                                             | 4 (1.3)                                             | 3 (1.0)                                        |
| Hypersensitivity                                    | 3 (1.0)                                             | 0                                              |
| Adrenal insufficiency                               | 3 (1.0)                                             | 0                                              |
| Bilirubin conjugated increased                      | 3 (1.0)                                             | 4 (1.3)                                        |
| Thyroxine free increased                            | 3 (1.0)                                             | 2 (0.7)                                        |
| Thyroxine free decreased                            | 3 (1.0)                                             | 1 (0.3)                                        |
| Occult blood positive                               | 3 (1.0)                                             | 0                                              |
| Drug eruption                                       | 3 (1.0)                                             | 0                                              |

**eTable 9. Immune-related adverse events. (Continued)**

|                           | <b>Camrelizumab-<br/>chemotherapy<br/>(N = 298)</b> | <b>Placebo-<br/>chemotherapy<br/>(N = 297)</b> |
|---------------------------|-----------------------------------------------------|------------------------------------------------|
| Productive cough          | 3 (1.0)                                             | 0                                              |
| Asthenia                  | 3 (1.0)                                             | 4 (1.3)                                        |
| Hematuria                 | 3 (1.0)                                             | 1 (0.3)                                        |
| Blood bilirubin increased | 1 (0.3)                                             | 3 (1.0)                                        |
| Death from unknown cause  | 1 (0.3)                                             | 3 (1.0)                                        |

Data are n (%).

**eTable 10. Baseline values and least squares mean score changes from baseline of the EORTC QLQ-C30.**

|                                                                            | <b>Camrelizumab-<br/>chemotherapy<br/>(N = 298)</b> | <b>Placebo-<br/>chemotherapy<br/>(N = 298)</b> | <b>Difference of least<br/>squares mean,<br/>two-sided <i>P</i> value</b> |
|----------------------------------------------------------------------------|-----------------------------------------------------|------------------------------------------------|---------------------------------------------------------------------------|
| <b>Global health status</b>                                                |                                                     |                                                |                                                                           |
| Baseline                                                                   | 68.8±20.2                                           | 67.4±19.1                                      |                                                                           |
| Score change                                                               | 0.5 (-2.6 to 3.6)                                   | -2.1 (-5.3 to 1.1)                             | 2.6 (0.0 to 5.2), 0.05                                                    |
| <b>Function (EORTC QLQ-C30 questionnaire scores)</b>                       |                                                     |                                                |                                                                           |
| <b>Physical functioning</b>                                                |                                                     |                                                |                                                                           |
| Baseline                                                                   | 92.0±10.7                                           | 90.9±11.1                                      |                                                                           |
| Score change                                                               | -6.9 (-9.4 to -4.3)                                 | -7.8 (-10.5 to -5.2)                           | 1.0 (-1.1 to 3.1), 0.36                                                   |
| <b>Role functioning</b>                                                    |                                                     |                                                |                                                                           |
| Baseline                                                                   | 92.7±13.9                                           | 91.8±14.8                                      |                                                                           |
| Score change                                                               | -4.2 (-7.3 to -1.1)                                 | -6.4 (-9.6 to -3.3)                            | 2.3 (-0.3 to 4.8), 0.09                                                   |
| <b>Emotional functioning</b>                                               |                                                     |                                                |                                                                           |
| Baseline                                                                   | 89.8±13.2                                           | 89.2±13.4                                      |                                                                           |
| Score change                                                               | -0.8 (-3.2 to 1.5)                                  | -1.7 (-4.0 to 0.7)                             | 0.8 (-1.1 to 2.8), 0.40                                                   |
| <b>Cognitive functioning</b>                                               |                                                     |                                                |                                                                           |
| Baseline                                                                   | 91.5±13.8                                           | 91.8±11.6                                      |                                                                           |
| Score change                                                               | -1.9 (-4.2 to 0.5)                                  | -1.8 (-4.2 to 0.6)                             | -0.1 (-2.0 to 1.9), 0.95                                                  |
| <b>Social functioning</b>                                                  |                                                     |                                                |                                                                           |
| Baseline                                                                   | 79.6±23.6                                           | 80.5±20.4                                      |                                                                           |
| Score change                                                               | -4.7 (-8.3 to -1.1)                                 | -6.4 (-10.1 to -2.6)                           | 1.7 (-1.4 to 4.7), 0.28                                                   |
| <b>Constitutional cancer symptoms (EORTC QLQ-C30 questionnaire scores)</b> |                                                     |                                                |                                                                           |
| <b>Fatigue</b>                                                             |                                                     |                                                |                                                                           |
| Baseline                                                                   | 18.4±18.3                                           | 19.3±17.5                                      |                                                                           |
| Score change                                                               | 5.0 (1.9 to 8.2)                                    | 6.5 (3.3 to 9.6)                               | -1.4 (-4.0 to 1.2), 0.28                                                  |
| <b>Nausea and vomiting</b>                                                 |                                                     |                                                |                                                                           |
| Baseline                                                                   | 5.1±12.0                                            | 5.8±11.9                                       |                                                                           |
| Score change                                                               | 2.3 (-0.4 to 4.9)                                   | 4.2 (1.5 to 6.9)                               | -1.9 (-4.1 to 0.3), 0.09                                                  |

**eTable 10. Baseline values and least squares mean score changes from baseline of the EORTC QLQ-C30 (Continued)**

|                               | <b>Camrelizumab-<br/>chemotherapy<br/>(N = 298)</b> | <b>Placebo-<br/>chemotherapy<br/>(N = 298)</b> | <b>Difference of least<br/>squares mean,<br/>two-sided <i>P</i> value</b> |
|-------------------------------|-----------------------------------------------------|------------------------------------------------|---------------------------------------------------------------------------|
| <b>Pain</b>                   |                                                     |                                                |                                                                           |
| Baseline                      | 16.5±20.1                                           | 18.1±19.3                                      |                                                                           |
| Score change                  | -5.0 (-7.7 to -2.4)                                 | -1.9 (-4.7 to 0.8)                             | -3.1 (-5.3 to -0.9),<br>0.006                                             |
| <b>Dyspnea</b>                |                                                     |                                                |                                                                           |
| Baseline                      | 8.7±15.2                                            | 10.9±19.1                                      |                                                                           |
| Score change                  | 1.9 (-1.0 to 4.7)                                   | 3.6 (0.7 to 6.5)                               | -1.7 (-4.1 to 0.7), 0.16                                                  |
| <b>Insomnia</b>               |                                                     |                                                |                                                                           |
| Baseline                      | 13.4±22.0                                           | 13.0±20.2                                      |                                                                           |
| Score change                  | -2.3 (-5.2 to 0.6)                                  | -0.4 (-3.3 to 2.6)                             | -1.9 (-4.3 to 0.5), 0.12                                                  |
| <b>Appetite loss</b>          |                                                     |                                                |                                                                           |
| Baseline                      | 13.5±22.7                                           | 15.4±23.3                                      |                                                                           |
| Score change                  | 2.3 (-1.2 to 5.7)                                   | 4.5 (1.0 to 8.1)                               | -2.3 (-5.2 to 0.6), 0.13                                                  |
| <b>Constipation</b>           |                                                     |                                                |                                                                           |
| Baseline                      | 9.5±17.6                                            | 11.6±19.9                                      |                                                                           |
| Score change                  | -0.8 (-3.7 to 2.1)                                  | 0 (-3.0 to 3.0)                                | -0.8 (-3.2 to 1.7), 0.53                                                  |
| <b>Diarrhea</b>               |                                                     |                                                |                                                                           |
| Baseline                      | 5.0±12.3                                            | 4.6±14.2                                       |                                                                           |
| Score change                  | -1.2 (-2.8 to 0.5)                                  | -1.6 (-3.3 to 0.1)                             | 0.5 (-1.0 to 1.8), 0.53                                                   |
| <b>Financial difficulties</b> |                                                     |                                                |                                                                           |
| Baseline                      | 34.9±30.8                                           | 37.7±32.2                                      |                                                                           |
| Score change                  | 3.5 (-0.9 to 7.8)                                   | 1.4 (-3.1 to 5.8)                              | 2.1 (-1.5 to 5.7), 0.25                                                   |

Data are mean ± standard deviation of baseline, and least squares mean (95% CI), difference of least squares mean (95% CI), and two-sided *P* value of score change.

**eTable 10. Baseline values and least squares mean score changes from baseline of the EORTC QLQ-C30. (Continued)**

Between-group differences of change from baseline to week 36 in the QLQ-C30 and QLQ-OES18 scores were assessed using mixed model repeated measures, with the score at baseline as covariate, randomization factors, treatment group, visit, treatment group multiplied by visit as fixed effects, and patients as random effect, with compound symmetry covariance structure. Detailed descriptions of quality of life are provided in statistical analysis plan.

Abbreviation: EORTC QLQ-C30, The European Organization for Research and Treatment of Cancer quality of life questionnaire Core 30.

**eTable 11. Baseline values and least squares mean score changes from baseline of the EORTC QLQ-OES18.**

|                                                                                   | <b>Camrelizumab-<br/>chemotherapy<br/>(N = 298)</b> | <b>Placebo-<br/>chemotherapy<br/>(N = 298)</b> | <b>Difference of least<br/>squares mean,<br/>two-sided <i>P</i> value</b> |
|-----------------------------------------------------------------------------------|-----------------------------------------------------|------------------------------------------------|---------------------------------------------------------------------------|
| <b>Esophageal cancer specific symptoms (EORTC QLQ-OES18 questionnaire scores)</b> |                                                     |                                                |                                                                           |
| <b>Dysphagia</b>                                                                  |                                                     |                                                |                                                                           |
| Baseline                                                                          | 26.9±27.9                                           | 26.4±27.0                                      |                                                                           |
| Score change                                                                      | 0.1 (-4.0 to 4.1)                                   | 2.1 (-2.1 to 6.3)                              | -2.1 (-5.4 to 1.3), 0.23                                                  |
| <b>Trouble swallowing saliva</b>                                                  |                                                     |                                                |                                                                           |
| Baseline                                                                          | 9.8±20.7                                            | 8.6±17.8                                       |                                                                           |
| Score change                                                                      | -3.8 (-6.1 to -1.5)                                 | -1.6 (-4.0 to 0.8)                             | -2.2 (-4.1 to -0.3), 0.03                                                 |
| <b>Choked when swallowing</b>                                                     |                                                     |                                                |                                                                           |
| Baseline                                                                          | 20.7±26.3                                           | 22.5±23.0                                      |                                                                           |
| Score change                                                                      | -9.7 (-12.7 to -6.7)                                | -6.3 (-9.4 to -3.2)                            | -3.4 (-5.9 to -0.8), 0.009                                                |
| <b>Eating</b>                                                                     |                                                     |                                                |                                                                           |
| Baseline                                                                          | 16.7±18.8                                           | 16.6±17.9                                      |                                                                           |
| Score change                                                                      | -3.6 (-6.1 to -1.1)                                 | -0.8 (-3.4 to 1.7)                             | -2.8 (-4.8 to -0.7), 0.009                                                |
| <b>Dry mouth</b>                                                                  |                                                     |                                                |                                                                           |
| Baseline                                                                          | 16.8±22.3                                           | 18.7±22.9                                      |                                                                           |
| Score change                                                                      | -0.8 (-3.7 to 2.2)                                  | -0.1 (-3.1 to 3.0)                             | -0.7 (-3.2 to 1.8), 0.59                                                  |
| <b>Trouble with taste</b>                                                         |                                                     |                                                |                                                                           |
| Baseline                                                                          | 9.3±17.7                                            | 9.2±17.9                                       |                                                                           |
| Score change                                                                      | 1.5 (-1.7 to 4.7)                                   | 1.4 (-1.9 to 4.8)                              | 0.1 (-2.6 to 2.8), 0.96                                                   |

**eTable 11. Baseline values and least squares mean score changes from baseline of the EORTC QLQ-OES18. (Continued)**

|                       | <b>Camrelizumab-<br/>chemotherapy<br/>(N = 298)</b> | <b>Placebo-<br/>chemotherapy<br/>(N = 298)</b> | <b>Difference of least<br/>squares mean,<br/>two-sided <i>P</i> value</b> |
|-----------------------|-----------------------------------------------------|------------------------------------------------|---------------------------------------------------------------------------|
| Trouble with coughing |                                                     |                                                |                                                                           |
| Baseline              | 11.0±20.6                                           | 10.5±18.8                                      |                                                                           |
| Score change          | -3.9 (-6.4 to -1.3)                                 | -2.7 (-5.3 to -0.2)                            | -1.1 (-3.2 to 1.0), 0.30                                                  |
| Trouble talking       |                                                     |                                                |                                                                           |
| Baseline              | 8.1±18.8                                            | 7.4±17.3                                       |                                                                           |
| Score change          | -2.5 (-5.0 to 0)                                    | -1.3 (-3.9 to 1.3)                             | -1.2 (-3.3 to 0.9), 0.25                                                  |
| Reflux                |                                                     |                                                |                                                                           |
| Baseline              | 12.9±18.3                                           | 12.8±16.8                                      |                                                                           |
| Score change          | -2.8 (-5.3 to -0.3)                                 | -1.9 (-4.4 to 0.7)                             | -0.9 (-3.0 to 1.2), 0.40                                                  |
| Pain                  |                                                     |                                                |                                                                           |
| Baseline              | 11.7±15.0                                           | 12.4±13.6                                      |                                                                           |
| Score change          | -5.6 (-7.5 to -3.6)                                 | -4.0 (-6.0 to -2.0)                            | -1.6 (-3.2 to 0.1), 0.06                                                  |

Data are mean ± standard deviation of baseline, and least squares mean (95% CI), difference of least squares mean (95% CI), and two-sided *P* value of score change.

Between-group differences of change from baseline to week 36 in the QLQ-C30 and QLQ-OES18 scores were assessed using mixed model repeated measures, with the score at baseline as covariate, randomization factors, treatment group, visit, treatment group multiplied by visit as fixed effects, and patients as random effect, with compound symmetry covariance structure. Detailed descriptions of quality of life are provided in statistical analysis plan.

Abbreviation: EORTC QLQ-OES18, The European Organization for Research and Treatment of Cancer quality of life questionnaire with an esophageal module.
