# Supplementary material
Source: PubMed Central journal article supplement (PMC8441593)
Supplement: jama-e2112836-s003.pdf [file jama-e2112836-s003.pdf]

\*Indicates required information. Only first name, last name, and suffix will appear in PubMed.

| <b>*Group Name(s): ESCORT-1st Investigators</b> |                   |                              |                  |                                                                                     |                                          |                                                         |                                                                                            |
|-------------------------------------------------|-------------------|------------------------------|------------------|-------------------------------------------------------------------------------------|------------------------------------------|---------------------------------------------------------|--------------------------------------------------------------------------------------------|
| <b>*First Name and Middle Initial(s)</b>        | <b>*Last Name</b> | <b>*Suffix (eg, Jr, III)</b> | Academic Degrees | Institution                                                                         | Location (city, state/province, country) | Role or Contribution, eg, chair, principal investigator | Group (if more than 1 Group listed in the byline) and/or Subgroup (eg, Steering Committee) |
| Xianglin                                        | Yuan              |                              | MD               | Tongji Medical College Huazhong University of Science & Technology                  | Wuhan, China                             | Principal investigator                                  |                                                                                            |
| Dong                                            | Ma                |                              | BS               | Guangdong Provincial People's Hospital                                              | Guangzhou, China                         | Principal investigator                                  |                                                                                            |
| Li                                              | Liu               |                              | MD               | Union Hospital Tongji Medical College Huazhong University of Science and Technology | Wuhan, China                             | Principal investigator                                  |                                                                                            |
| Feng                                            | Ye                |                              | PhD              | The First Affiliated Hospital of Xiamen University                                  | Xiamen, China                            | Principal investigator                                  |                                                                                            |
| Tianshu                                         | Liu               |                              | MD               | Zhongshan Hospital of Fudan University                                              | Shanghai, China                          | Principal investigator                                  |                                                                                            |
| Xiuwen                                          | Wang              |                              | MD               | Qilu Hospital of Shandong University                                                | Jinan, China                             | Principal investigator                                  |                                                                                            |
| Likun                                           | Liu               |                              | MD               | Shanxi Provincial Hospital of Traditional Chinese Medicine                          | Taiyuan, China                           | Principal investigator                                  |                                                                                            |
| Bing                                            | Xia               |                              | MD               | Hangzhou First People's Hospital                                                    | Hangzhou, China                          | Principal investigator                                  |                                                                                            |
| Fengming                                        | Ran               |                              | MM               | Hubei Cancer Hospital                                                               | Wuhan, China                             | Principal investigator                                  |                                                                                            |
| Sanyuan                                         | Sun               |                              | MD               | Xuzhou Central Hospital                                                             | Nanjing, China                           | Principal investigator                                  |                                                                                            |
| Zhanhui                                         | Miao              |                              | MM               | The First Affiliated Hospital of Xinxiang Medical College                           | Xinxiang, China                          | Principal investigator                                  |                                                                                            |
| Jun                                             | Bie               |                              | MD               | Nanchong Central Hospital                                                           | Nanchong, China                          | Principal investigator                                  |                                                                                            |
| Yong                                            | Gao               |                              | MD               | Shanghai Dongfang Hospital                                                          | Shanghai, China                          | Principal investigator                                  |                                                                                            |
| Junyan                                          | Yu                |                              | MD               | Heping Hospital Affiliated to Changzhi Medical College                              | Changzhi, China                          | Principal investigator                                  |                                                                                            |
| Li                                              | Chen              |                              | MD               | The First Affiliated Hospital of Nanchang University                                | Nanchang, China                          | Principal investigator                                  |                                                                                            |
| Yifu                                            | He                |                              | MD               | Anhui Provincial Cancer Hospital                                                    | Hefei, China                             | Principal investigator                                  |                                                                                            |
| Wei                                             | Ren               |                              | MD               | Drum Tower Hospital Affiliated to Nanjing University of Medicine                    | Nanjing, China                           | Principal investigator                                  |                                                                                            |
| Suxia                                           | Luo               |                              | MD               | Henan Cancer Hospital                                                               | Zhengzhou, China                         | Principal investigator                                  |                                                                                            |

## Supplemental Online Content: Nonauthor Collaborators

\*Indicates required information. Only first name, last name, and suffix will appear in PubMed.

| *First Name and Middle Initial(s) | *Last Name | *Suffix (eg, Jr, III) | Academic Degrees | Institution                                                                  | Location (city, state/province, country) | Role or Contribution, eg, chair, principal investigator | Group (if more than 1 Group listed in the byline) and/or Subgroup (eg, Steering Committee) |
|-----------------------------------|------------|-----------------------|------------------|------------------------------------------------------------------------------|------------------------------------------|---------------------------------------------------------|--------------------------------------------------------------------------------------------|
| Guangqiang                        | Zhao       |                       | MD               | Yunnan Cancer Hospital                                                       | Kunming, China                           | Principal investigator                                  |                                                                                            |
| Youen                             | Lin        |                       | BS               | Jieyang People's Hospital                                                    | Jieyang, China                           | Principal investigator                                  |                                                                                            |
| Long                              | Chen       |                       | MD               | Guangxi Medical University<br>Affiliated Tumor Hospital                      | Nanning, China                           | Principal investigator                                  |                                                                                            |
| Zhiyuan                           | Guo        |                       | MM               | Handan Central Hospital                                                      | Handan, China                            | Principal investigator                                  |                                                                                            |
| Chunhong                          | Hu         |                       | MD               | The Second Xiangya Hospital of<br>Central South University                   | Changsha, China                          | Principal investigator                                  |                                                                                            |
| Ying                              | Wang       |                       | MD               | Chongqing University Cancer<br>Hospital                                      | Chongqing, China                         | Principal investigator                                  |                                                                                            |
| Nong                              | Xu         |                       | MM               | The First Affiliated Hospital of<br>Medical School of Zhejiang<br>University | Hangzhou, China                          | Principal investigator                                  |                                                                                            |
| Baofu                             | Chen       |                       | MD               | Taizhou Hospital of Zhejiang<br>Province                                     | Taizhou, China                           | Principal investigator                                  |                                                                                            |
| Xianbao                           | Zhan       |                       | MD               | Shanghai Changhai Hospital                                                   | Shanghai, China                          | Principal investigator                                  |                                                                                            |
| Yuping                            | Chen       |                       | BS               | Cancer Hospital of Shantou<br>University Medical College                     | Guangzhou, China                         | Principal investigator                                  |                                                                                            |
| Hongda                            | Lu         |                       | MD               | The Central Hospital of Wuhan                                                | Wuhan, China                             | Principal investigator                                  |                                                                                            |
| Shukui                            | Qin        |                       | MM               | Qinhuai Hospital of General Hospital<br>of Eastern Theater Command           | Nanjing, China                           | Principal investigator                                  |                                                                                            |
| Guolei                            | Wang       |                       | BS               | Henan Provincial Chest Hospital                                              | Zhengzhou, China                         | Principal investigator                                  |                                                                                            |
| Liming                            | Chen       |                       | MM               | The First Affiliated Hospital of<br>Shantou University Medical College       | Shantou, China                           | Principal investigator                                  |                                                                                            |
| Li                                | Bai        |                       | MD               | PLA General Hospital                                                         | Beijing, China                           | Principal investigator                                  |                                                                                            |
| Jingdong                          | Zhang      |                       | MD               | Liaoning Province Cancer Hospital                                            | Shenyang, China                          | Principal investigator                                  |                                                                                            |
