# Supplementary material
Source: PubMed Central journal article supplement (PMC8441593)
Supplement: jama-e2112836-s004.pdf [file jama-e2112836-s004.pdf]

## **Data Sharing Statement**

### **Data**

**Data available:** No

### **Additional Information**

**Explanation for why data not available:** Data can be made available upon reasonable request.
